# Supplementary material for: Multiplex metal-detection based assay (MMDA) for COVID-19 diagnosis and identification of disease severity biomarkers
Source: Royal Society of Chemistry journal article supplement (doi:10.1039/d1sc05852e), 2022-01-01
Supplement: d1sc05852e1.xlsx [file d1sc05852e1.xlsx]

## Sheet: Fig. 2A-B Fig S1
	Relative intensity compared with mean value of 104 non-infected individuals
	N IgA Health	N IgA Patients	S IgA Health	S IgA Patients	N IgM Health	N IgM Patients	S IgM Health	S IgM Patients	N IgG Health	N IgG Patients	S IgG Health	S IgG Patients
	0.266276	2.51584	0.339209	1.32042	0.789409	1.83401	0.702634	1.97433	0.680804	2.50981	0.836077	1.63149
	0.499119	2.23727	0.68108	1.97093	1.02931	1.27335	0.921801	1.17546	1.09904	1.4139	1.29587	1.48029
	0.560868	4.33893	0.7085	4.53348	1.55362	1.46155	1.57601	1.95241	0.902207	1.87633	0.985146	1.69079
	0.700372	12.1881	0.806763	5.62824	1.76875	1.62537	1.64935	2.45748	0.741771	2.77023	0.90532	2.14765
	0.676032	3.28077	0.888881	1.7454	1.38949	2.90503	1.42189	2.24836	0.88687	1.831	1.06066	1.37353
	0.983263	3.4124	1.26066	4.18822	0.512865	1.19736	0.57559	1.71601	0.919798	1.66125	1.1179	1.81539
	1.55161	4.34971	1.63952	4.08592	0.721156	1.36152	0.275357	1.62211	1.17431	1.67997	1.23241	2.02346
	1.74826	5.47034	1.73216	5.30305	1.14647	2.99998	0.898145	2.26114	1.50225	2.02048	1.50528	1.84928
	1.25427	4.51218	1.37395	3.76734	0.187338	2.88385	0.248519	2.78637	1.24062	1.83125	1.1702	1.63481
	1.22487	2.42974	0.804958	3.51294	0.283182	2.17906	0.216205	3.90867	0.85156	1.64565	0.720879	2.11633
	0.60456	1.47915	0.824488	1.1343	1.05436	4.50462	1.26884	3.73487	0.917575	1.98398	1.0932	1.87287
	1.56892	4.0853	1.97022	6.39984	1.07225	2.57124	1.10079	2.92973	1.24383	2.29797	1.4381	1.8797
	0.536242	6.58118	0.568109	3.75678	1.07522	3.19291	1.09975	12.5615	0.943621	2.54877	0.963681	2.43102
	0.961948	2.61548	1.10641	5.228	1.72731	2.20597	1.9274	3.0365	1.46888	1.50878	1.26613	1.54733
	1.03335	4.63527	1.22791	5.9684	1.43676	2.3766	1.69851	3.17036	1.12557	2.34621	1.07511	2.55503
	1.27599	6.52002	1.49601	3.34274	1.43555	1.20761	1.85767	1.23309	1.193	2.21898	1.24464	1.79841
	1.15253	2.91719	1.30045	3.76548	1.342	0.966281	1.58171	1.26242	1.28634	1.30297	1.16346	1.59381
	0.533731	2.43589	0.756509	4.29473	1.36897	0.511989	1.9352	0.540841	0.912726	2.18536	1.11775	1.34603
	1.19313	2.88033	1.31189	2.43488	1.62852	1.26179	1.98616	1.47469	1.21134	1.96498	1.29545	1.70618
	0.703585	2.86763	1.03936	2.5784	0.832871	1.13521	1.28024	1.41534	0.949451	2.64981	1.18817	2.20698
	0.845841	13.5099	1.19412	4.47713	0.660398	3.62818	0.808545	3.10134	0.984784	2.67036	1.12835	2.05167
	1.49426	5.51475	1.65574	4.9426	1.42827	2.53818	1.66643	2.8949	1.21488	1.89875	1.24788	1.83832
	0.755778	2.35831	0.930266	2.22314	0.360294	0.798041	0.386485	0.798292	0.698845	1.86761	0.736035	1.82701
	0.897917	1.98131	1.02419	1.66559	0.784466	2.92264	1.00162	2.42869	0.628888	1.84963	0.634297	1.53133
	0.180485	3.91247	0.209752	2.96204	0.540474	2.01626	0.621848	2.07662	1.38029	2.45123	1.36571	2.08751
	0.952471	2.23422	0.981827	2.71891	1.17916	0.37399	1.3693	0.40502	1.23804	1.40155	1.06141	1.9313
	0.942758	4.32499	0.829223	3.40868	2.10912	1.83007	1.48914	2.5569	1.37362	2.50101	1.21655	2.18022
	0.762919	5.05914	0.676812	2.64019	0.36055	1.66067	0.358223	1.25993	0.875371	2.28591	0.588827	1.85306
	1.21829	3.52928	1.23647	3.53027	0.670423	1.07995	0.772909	1.32009	0.899896	2.10555	0.767591	1.89262
	1.60551	3.70802	1.50097	3.63177	0.514261	1.63439	0.814748	1.54465	1.06209	2.11316	0.838115	1.89473
	1.69257	3.98024	2.13596	3.20498	0.376184	1.39022	0.514853	1.06278	0.923124	2.32112	0.955141	2.12246
	0.708067	3.54459	0.922503	1.30222	0.286159	7.26385	0.494624	4.749	1.28447	2.80121	1.51871	1.59563
	0.521537	3.03439	0.690673	2.96574	0.879107	1.21981	1.11457	0.963998	1.01922	2.09486	1.11002	1.81706
	1.09068	5.22078	1.23633	3.0865	0.684496	1.11741	0.833686	0.83596	0.778232	2.34468	0.821308	1.44237
	0.523492	2.91189	0.629369	4.06	0.389188	0.781191	0.55279	0.88679	1.20652	1.63062	1.31966	2.03767
	3.71321	3.03786	3.81464	2.85374	1.20509	1.53053	1.49689	1.5884	1.33036	2.07991	1.32215	1.64018
	1.46451	4.96354	1.7509	3.82031	0.681797	3.25882	0.922036	4.41047	0.916889	2.66719	1.10033	2.05481
	1.08697	2.9397	1.22135	2.88353	0.764044	2.12663	1.12621	2.10619	0.916031	1.90017	1.21381	1.66156
	1.33941	4.95784	1.56584	1.93411	0.397138	0.7946	0.572008	0.832053	1.03184	1.90042	1.32256	1.11783
	1.96353	3.69716	1.74606	4.00224	1.14997	0.685329	1.14857	0.746739	1.53862	2.28541	1.42327	2.18867
	1.48859	1.84655	1.21899	1.48951	1.41044	1.96037	1.32287	2.21842	1.3966	1.60611	1.46053	1.42493
	2.12658	4.25054	1.51685	2.22648	0.810241	2.0643	0.646941	1.85705	1.25981	2.30659	1.00557	1.30627
	1.17102	4.07325	0.821218	2.34539	0.616363	2.80785	0.474598	1.7942	1.191	2.49391	1.02333	1.54983
	2.24802	3.21399	2.24323	3.11102	0.297679	2.00565	0.363015	3.13623	1.01723	2.63726	1.08699	2.14858
	1.9123	2.55916	1.58848	1.86726	0.67432	0.549971	0.622297	0.384477	1.08908	1.45414	1.00997	1.21867
	0.843651	1.32783	0.750274	1.07104	2.3618	0.772791	2.24976	0.717271	1.14946	1.15594	1.22637	1.0939
	0.835749	3.06366	0.682878	2.50656	2.46341	2.99247	2.2567	3.11844	0.980217	1.75565	0.858138	1.55407
	1.07952	4.14531	0.897481	3.64019	1.36308	4.54964	1.12853	5.38173	1.00266	2.18098	1.06573	1.83062
	0.984233	4.39846	0.767103	3.30281	1.59665	1.60986	1.37258	1.49773	1.08469	2.10025	0.892592	1.95521
	1.12822	2.31513	0.827257	2.29228	0.751097	2.7762	0.703651	2.43905	1.0661	1.81102	0.872185	1.55608
	1.22547	4.84905	0.994961	3.34284	2.43823	1.13629	2.39934	0.996957	1.14369	2.10034	0.97515	1.84224
	1.31409	2.8064	0.918833	2.34203	0.410264	4.29284	0.397598	4.25872	1.10964	2.21918	0.945159	1.82597
	1.05483	3.90317	0.788295	3.30679	0.758147	1.38902	0.67796	1.38816	0.980727	2.14963	0.806699	1.73812
	1.09592	4.96535	0.768402	4.78427	0.712981	1.27764	0.593313	1.70309	1.19908	2.68251	0.901185	1.99421
	0.353468	5.83327	0.256784	6.95927	1.11983	2.50339	1.03414	2.83749	0.942659	1.92872	0.810509	2.13012
	2.56913	2.32321	1.71966	2.17148	0.899378	2.99067	0.811835	3.37927	1.41208	1.84966	1.16012	1.77706
	0.183737	2.27625	0.140752	1.88744	0.423986	2.23702	0.354837	2.55271	0.994308	1.66053	0.791632	1.65748
	1.00083	3.37347	0.601933	3.10755	1.16938	2.11366	0.879548	1.78158	1.37091	1.96554	0.947254	1.88325
	0.686109	3.09203	0.580056	2.45547	0.991454	2.26228	0.940614	2.26577	0.93062	2.27212	0.86082	1.89569
	0.454038	2.22464	0.413506	1.59482	0.872379	0.858149	0.853955	0.813967	0.823685	1.47576	0.756893	1.08969
	0.589555	3.36564	0.47603	2.96039	0.639034	1.28089	0.643535	1.20064	0.914492	2.08457	0.746761	1.78451
	0.647621	5.38313	0.484775	3.83559	1.3128	3.20445	1.24298	2.73258	0.918251	2.39601	0.724343	1.66529
	0.676325	2.55633	0.530711	2.8853	0.903352	2.24316	0.928029	2.40565	1.14579	1.66925	1.06074	1.66959
	1.04206	5.9	0.788309	4.48681	1.29405	3.16584	1.16744	3.96552	1.05324	2.31966	0.965725	2.01488
	1.08056	2.65826	0.919204	3.06963	1.74755	3.7637	1.72078	4.52139	1.31181	2.11187	1.15721	2.1413
	1.04792	3.98593	1.15212	2.441	0.944387	1.36077	0.912883	1.40963	0.962011	2.23052	1.1299	2.0206
	0.619355	4.57527	0.917427	4.34534	0.954239	1.22696	1.28888	1.31805	0.929399	2.87648	1.21962	2.04005
	0.859306	2.19151	0.927149	1.787	0.425374	2.17051	0.396355	2.27576	0.939032	1.64472	0.967736	1.40851
	1.03283	3.37666	1.20955	2.86672	1.19458	2.27963	1.05174	2.31384	1.26954	1.6946	1.33351	1.59075
	0.669022	1.8725	0.639994	2.29612	0.913435	2.06135	0.84719	2.69436	1.32885	1.89273	1.30816	2.14411
	1.03141	2.05215	1.14505	2.23197	1.39965	2.0226	1.3984	2.76356	1.10175	2.01151	1.19423	2.10411
	1.05657	1.57551	0.960359	1.51215	1.78137	1.8808	1.62511	1.93235	1.06464	1.98559	1.04666	1.7951
	0.852777	2.66032	0.968215	3.19014	2.03738	1.63065	1.84826	2.09912	1.02202	2.38226	1.10139	2.07997
	0.730488	3.77888	0.992307	2.66493	0.582602	2.0699	0.718863	1.46992	0.737016	1.80221	0.995902	1.40854
	0.523909	2.63521	0.588174	2.16898	0.785019	2.10919	0.625484	2.10096	0.67245	1.757	0.883221	1.59079
	1.33887	2.97851	1.1828	2.56957	3.15761	0.929921	2.58455	0.807358	1.34003	2.18939	1.11183	1.44586
	1.32463	5.19911	1.49613	5.13587	1.10106	2.27643	1.18634	1.97503	0.979889	2.26036	1.07833	2.02646
	0.789725	3.71904	1.05303	3.88823	1.35479	2.30364	1.64257	2.3437	0.857398	2.01952	1.04216	2.07516
	0.695919	3.48801	0.831792	3.34629	1.68302	3.67263	1.87644	3.89816	0.822574	2.04978	1.00893	1.91746
	0.633702	3.71462	0.69104	4.12712	0.844892	2.12854	1.02529	2.15305	0.655961	1.78605	0.814863	1.9607
	0.681031	3.63475	0.83665	4.25658	0.470405	1.29678	0.435112	2.12161	0.739969	1.7299	0.916357	2.00269
	0.917425	2.68351	0.857096	2.69239	0.290726	1.64483	0.248909	1.42753	1.16693	1.70604	1.14451	1.62191
	0.195465	2.47017	0.182024	1.7831	0.676944	3.09988	0.621557	2.75461	1.16173	1.8793	1.00454	1.72403
	0.700929	1.7691	0.617837	1.66216	0.673187	3.24687	0.482989	3.97776	0.927872	1.9547	0.901452	1.95867
	1.31428	2.098	0.862588	1.55607	1.36155	1.30648	0.912863	1.05322	1.01119	1.86835	0.719484	1.56261
	0.787026	3.28781	0.854263	2.91565	1.38621	2.39985	1.45215	2.36956	0.860319	2.36569	0.869043	1.74731
	0.756949	2.07037	0.832436	2.64286	1.77503	1.50029	1.70737	1.7134	0.816617	1.75543	1.25443	1.83846
	1.12011	1.32237	1.14777	1.87198	0.534905	1.4435	0.538787	1.87573	0.995959	1.59574	1.14918	1.99402
	1.33166	0.816369	1.42515	0.851294	0.711674	2.16755	0.752915	2.32397	0.806918	1.79989	0.950196	1.38119
	1.9333	2.89739	1.73223	2.5465	1.23132	4.43747	1.32609	3.93875	1.39437	2.0651	1.17664	1.69478
	1.4892	0.100839	1.29738	0.094348	1.42498	0.057101	1.40637	0.094348	0.883112	0.466649	0.833451	0.476969
	1.66067	0.090523	1.65798	0.075713	0.800418	0.043055	0.697805	0.075713	1.06968	0.462574	1.1907	0.437501
	2.03564	0.09015	2.12904	0.070485	0.765453	0.032243	0.639667	0.070485	1.11401	0.430039	1.21362	0.428138
	0.999656	0.055655	0.768582	0.051486	0.798712	0.030607	0.468184	0.051486	1.21329	0.381512	0.947186	0.426488
	1.57321	5.47201	1.85458	2.80468	0.792222	1.2923	0.523566	1.95466	1.35527	2.13165	1.21766	1.28125
	1.53075	4.89021	1.47582	3.53577	1.54809	2.71174	1.43662	9.25475	0.965507	5.88522	0.935341	2.3159
	0.666213	2.93322	0.671218	2.21955	1.64377	2.53113	1.59493	1.37322	0.953082	1.361	1.11807	1.35621
	1.52463	3.91207	1.47898	4.47947	2.46166	2.99113	2.37653	2.93564	0.940212	2.02636	0.885006	1.57464
	1.08411	12.3791	0.95274	6.90204	1.08448	8.70174	0.993634	6.17515	1.16491	6.35682	1.02645	4.93826
	0.565585	3.003	0.583168	3.61348	0.291072	1.69865	0.408124	2.07594	0.673591	1.4194	0.692396	1.68456
	0.274823	5.59955	0.313852	4.53815	0.520063	2.20941	0.519809	2.80721	0.264594	5.95945	0.258065	2.08063
	0.193239	7.58019	0.202516	6.59894	0.31335	4.0636	0.273237	4.60883	0.715793	5.97944	0.704456	2.95831
	0.150526	4.12424	0.323015	7.43518	0.653606	2.22634	1.09179	2.18652	0.573666	2.43206	0.60032	3.69485
	0.254267	4.79062	0.165812	5.23772	0.523532	2.91776	0.359731	3.52427	0.476149	4.55153	0.264109	3.20539
	0.143189	1.35474	0.244272	2.22748	0.185238	1.05527	0.147039	1.98676	0.251416	0.919394	0.339813	1.12811
	0.645549	1.56678	0.445917	1.82315	0.215512	1.81434	0.157113	1.23055	0.610649	1.3064	0.555103	0.952804
	0.521683	1.89788	0.538606	2.45264	0.899098	2.91775	0.170777	2.65383	0.44722	1.11756	0.652322	0.985869
	0.274886		0.51802		0.388059		0.628675		0.411889		0.631964
	0.456402		0.398153		0.162072		0.120037		0.602388		0.540443
	0.4304		0.391153		0.443331		0.405148		0.707734		0.592471

## Sheet: Fig 2C
	Relative intensity
	N IgA	S IgA	N IgM	S IgM	N IgG	S IgG	N IgA	N IgG	S IgA	S IgG
	4.63527	5.9684	2.3766	3.17036	2.34621	2.55503	4.63527	2.34621	5.9684	2.55503
	6.52002	3.34274	1.20761	1.23309	2.21898	1.79841	6.52002	2.21898	3.34274	1.79841
	2.91719	3.76548	0.966281	1.26242	1.30297	1.59381	2.91719	1.30297	3.76548	1.59381
	2.43589	4.29473	0.511989	0.540841	2.18536	1.34603	2.43589	2.18536	4.29473	1.34603
	2.51584	1.32042	1.83401	1.97433	2.50981	1.6315	2.51584	2.50981	1.32042	1.6315
	2.88033	2.43488	1.26179	1.47469	1.96498	1.70618	2.88033	1.96498	2.43488	1.70618
	14.6684	2.80114	1.21777	1.2279	3.0299	1.82915	14.6684	3.0299	2.80114	1.82915
	2.86763	2.5784	1.13521	1.41534	2.64981	2.20698	2.86763	2.64981	2.5784	2.20698
	13.5099	4.47713	3.62818	3.10134	2.67036	2.05167	13.5099	2.67036	4.47713	2.05167
	5.51475	4.9426	2.53818	2.8949	1.89875	1.83832	5.51475	1.89875	4.9426	1.83832
	2.35831	2.22314	0.798041	0.798292	1.86761	1.82701	2.35831	1.86761	2.22314	1.82701
	1.98131	1.66559	2.92264	2.42869	1.84963	1.53133	1.98131	1.84963	1.66559	1.53133
	3.91247	2.96204	2.01626	2.07662	2.45123	2.08751	3.91247	2.45123	2.96204	2.08751
	2.23422	2.71891	0.37399	0.40502	1.40155	1.9313	2.23422	1.40155	2.71891	1.9313
	4.32499	3.40868	1.83007	2.5569	2.50101	2.18022	4.32499	2.50101	3.40868	2.18022
	5.05914	2.64018	1.66067	1.25993	2.28591	1.85306	5.05914	2.28591	2.64018	1.85306
	2.23727	1.97093	1.27335	1.17546	1.4139	1.48029	2.23727	1.4139	1.97093	1.48029
	3.52928	3.53027	1.07995	1.32009	2.10555	1.89262	3.52928	2.10555	3.53027	1.89262
	3.70802	3.63177	1.63439	1.54465	2.11316	1.89473	3.70802	2.11316	3.63177	1.89473
	3.98024	3.20498	1.39022	1.06278	2.32112	2.12246	3.98024	2.32112	3.20498	2.12246
	3.54459	1.30222	7.26385	4.749	2.80121	1.59563	3.54459	2.80121	1.30222	1.59563
	3.03439	2.96574	1.21981	0.963998	2.09486	1.81706	3.03439	2.09486	2.96574	1.81706
	5.22078	3.0865	1.11741	0.83596	2.34468	1.44237	5.22078	2.34468	3.0865	1.44237
	2.91189	4.06	0.781191	0.88679	1.63062	2.03767	2.91189	1.63062	4.06	2.03767
	3.03786	2.85374	1.53053	1.5884	2.07991	1.64018	3.03786	2.07991	2.85374	1.64018
	4.96354	3.82031	3.25882	4.41047	2.66719	2.05481	4.96354	2.66719	3.82031	2.05481
	4.33893	4.53348	1.46155	1.95241	1.87633	2.12343	4.33893	1.87633	4.53348	2.12343
	7.60714	5.04819	1.75868	2.34122	2.53933	2.21445	7.60714	2.53933	5.04819	2.21445
	2.9397	2.88353	2.12663	2.10619	1.90017	1.66156	2.9397	1.90017	2.88353	1.66156
	12.1881	5.62824	1.62537	2.45748	2.77023	2.44571	12.1881	2.77023	5.62824	2.44571
	3.28077	1.7454	3.59423	2.24836	2.15044	1.37353	3.28077	2.15044	1.7454	1.37353
	4.95784	1.93411	0.7946	0.832053	1.90042	1.11783	4.95784	1.90042	1.93411	1.11783
	3.69716	4.00224	0.685329	0.746739	2.28541	2.18867	3.69716	2.28541	4.00224	2.18867
	1.84655	1.48951	1.96037	2.21842	1.60611	1.42493	1.84655	1.60611	1.48951	1.42493
	4.25054	2.22648	2.0643	1.85705	2.30659	1.30627	4.25054	2.30659	2.22648	1.30627
	3.4124	4.18821	1.19735	1.71601	1.66125	1.81539	3.4124	1.66125	4.18821	1.81539
	4.34971	4.08592	1.36152	1.62211	1.67997	2.02346	4.34971	1.67997	4.08592	2.02346
	4.07325	2.34539	2.80785	1.7942	2.49391	1.54983	4.07325	2.49391	2.34539	1.54983
	3.21399	3.11102	2.00565	3.13623	2.63726	2.14858	3.21399	2.63726	3.11102	2.14858
	2.55916	1.86726	0.549971	0.384477	1.45415	1.21867	2.55916	1.45415	1.86726	1.21867
	1.32783	1.07104	0.772791	0.717271	1.15594	1.0939	1.32783	1.15594	1.07104	1.0939
	5.47034	5.30305	2.99998	2.26114	2.02048	1.84928	5.47034	2.02048	5.30305	1.84928
	3.06366	2.50656	2.99247	3.11844	1.75565	1.55407	3.06366	1.75565	2.50656	1.55407
	4.51218	3.76734	2.88385	2.78637	1.83125	1.63481	4.51218	1.83125	3.76734	1.63481
	4.14531	3.64019	4.54964	5.38173	2.18098	1.83062	4.14531	2.18098	3.64019	1.83062
	4.39846	3.30281	1.60986	1.49773	2.10025	1.95521	4.39846	2.10025	3.30281	1.95521
	2.31513	2.29228	2.7762	2.43905	1.81102	1.55608	2.31513	1.81102	2.29228	1.55608
	4.84905	3.34284	1.13629	0.996957	2.10034	1.84224	4.84905	2.10034	3.34284	1.84224
	2.8064	2.34203	4.29284	4.25872	2.21918	1.82597	2.8064	2.21918	2.34203	1.82597
	3.90317	3.30679	1.38902	1.38816	2.14963	1.73812	3.90317	2.14963	3.30679	1.73812
	4.96535	4.78427	1.27764	1.70309	2.68251	1.99421	4.96535	2.68251	4.78427	1.99421
	2.42974	3.51294	2.17906	3.90867	1.64565	2.11633	2.42974	1.64565	3.51294	2.11633
	1.47915	1.1343	4.50462	3.73487	1.98398	1.49301	1.47915	1.98398	1.1343	1.49301
	4.0853	6.39984	2.57124	2.92973	2.29797	1.8797	4.0853	2.29797	6.39984	1.8797
	5.83327	6.95927	2.50339	2.83749	1.92872	2.13012	5.83327	1.92872	6.95927	2.13012
	2.32321	2.17148	2.99067	3.37927	1.84966	1.77706	2.32321	1.84966	2.17148	1.77706
	2.27625	1.88744	2.23702	2.55271	1.66053	1.65748	2.27625	1.66053	1.88744	1.65748
	4.7508	5.52636	3.26822	4.56114	2.30004	1.81088	4.7508	2.30004	5.52636	1.81088
	4.26739	3.10755	2.11366	1.78158	2.3716	1.88325	4.26739	2.3716	3.10755	1.88325
	3.09203	2.45547	2.26228	2.26577	2.27212	1.89569	3.09203	2.27212	2.45547	1.89569
	6.58118	3.75678	3.19291	12.5615	2.54877	2.43102	6.58118	2.54877	3.75678	2.43102
	2.22464	1.59482	0.858149	0.813967	1.47576	1.08969	2.22464	1.47576	1.59482	1.08969
	3.36564	2.96039	1.28089	1.20064	2.08457	1.78451	3.36564	2.08457	2.96039	1.78451
	5.38313	3.83559	3.20445	2.73258	2.39601	1.66529	5.38313	2.39601	3.83559	1.66529
	2.55633	2.8853	2.24316	2.40565	1.66925	1.66959	2.55633	1.66925	2.8853	1.66959
	5.9	4.48681	3.16584	3.96552	2.31966	2.01488	5.9	2.31966	4.48681	2.01488
	2.65826	3.06963	3.7637	4.52139	2.11187	2.1413	2.65826	2.11187	3.06963	2.1413
	3.98593	2.441	1.36077	1.40963	2.23052	2.0206	3.98593	2.23052	2.441	2.0206
	4.57527	4.34534	1.22696	1.31805	2.87648	2.04005	4.57527	2.87648	4.34534	2.04005
	2.19151	1.787	2.17051	2.27576	1.64472	1.40851	2.19151	1.64472	1.787	1.40851
	3.37666	2.86672	2.27962	2.31384	1.6946	1.59075	3.37666	1.6946	2.86672	1.59075
	4.03817	2.5981	1.94886	2.20631	2.52824	1.53132	4.03817	2.52824	2.5981	1.53132
	1.8725	2.29612	2.06135	2.69436	1.89273	2.14411	1.8725	1.89273	2.29612	2.14411
	2.05215	2.23197	2.0226	2.76356	2.01151	2.10411	2.05215	2.01151	2.23197	2.10411
	1.57551	1.51215	1.8808	1.93235	1.98559	1.7951	1.57551	1.98559	1.51215	1.7951
	2.66032	3.19014	1.63065	2.09912	2.38226	2.07997	2.66032	2.38226	3.19014	2.07997
	2.61548	5.228	2.20597	3.0365	1.50878	1.54733	2.61548	1.50878	5.228	1.54733
	3.77888	2.66493	2.0699	1.46992	1.89251	1.40854	3.77888	1.89251	2.66493	1.40854
	2.63521	2.16898	2.10919	2.10096	1.757	1.59079	2.63521	1.757	2.16898	1.59079
	2.97851	2.56957	0.929921	0.807358	2.18939	1.44586	2.97851	2.18939	2.56957	1.44586
	5.19911	5.13588	2.27643	1.97503	2.26036	2.02646	5.19911	2.26036	5.13588	2.02646
	3.71904	3.88823	2.30364	2.3437	2.01952	2.07516	3.71904	2.01952	3.88823	2.07516
	3.48801	3.34629	3.67263	3.89816	2.04978	1.91746	3.48801	2.04978	3.34629	1.91746
	3.69403	4.12712	2.07123	2.15305	1.78612	1.9607	3.69403	1.78612	4.12712	1.9607
	3.63475	4.25658	1.29678	2.12161	1.7299	2.00269	3.63475	1.7299	4.25658	2.00269
	2.68351	2.69239	1.64483	1.42753	1.70604	1.62191	2.68351	1.70604	2.69239	1.62191
	2.47017	1.7831	3.09988	2.75461	1.8793	1.72403	2.47017	1.8793	1.7831	1.72403
	1.7691	1.31887	3.24687	2.76786	1.9547	1.95867	1.7691	1.9547	1.31887	1.95867
	2.098	1.55607	1.30648	1.05322	1.96636	1.56261	2.098	1.96636	1.55607	1.56261
	3.28781	2.91564	2.39985	2.36956	2.36569	1.74731	3.28781	2.36569	2.91564	1.74731
	2.07037	2.64286	1.50028	1.7134	1.75543	1.83846	2.07037	1.75543	2.64286	1.83846
	1.32237	1.87198	1.4435	1.87573	1.59574	1.99402	1.32237	1.59574	1.87198	1.99402
	0.816369	0.851294	2.16755	2.32397	1.79989	1.38119	0.816369	1.79989	0.851294	1.38119
	2.89739	2.5465	4.43746	3.93875	2.0651	1.69478	2.89739	2.0651	2.5465	1.69478
		NIgA	SIgA	NIgM	SIgM	NIgG	SIgG
	NIgA	1	0.644513	0.258336	0.276513	0.684023	0.490146
	SIgA	0.644513	1	0.209617	0.301259	0.550159	0.647747
	NIgM	0.258336	0.209617	1	0.754788	0.484026	0.372041
	SIgM	0.276513	0.301259	0.754788	1	0.434809	0.489588
	NIgG	0.684023	0.550159	0.484026	0.434809	1	0.749959
	SIgG	0.490146	0.647747	0.372041	0.489588	0.749959	1

## Sheet: Fig 3A
	Gender
	N IgA		S IgA		N IgM		S IgM		N IgG		S IgG
	Female	Male	Female	Male	Female	Male	Female	Male	Female	Male	Female	Male
	2.23727	2.91189	1.97093	4.06	1.27335	0.781191	1.17546	0.88679	1.4139	1.63062	1.48029	2.03767
	4.14531	3.54459	3.64019	1.30222	4.54964	7.26385	5.38173	4.749	2.18098	2.80121	1.83062	1.59563
	3.71904	2.43589	3.88823	4.29473	2.30364	0.511989	2.3437	0.540841	2.01952	2.18536	2.07516	1.34603
	3.52928	5.47034	3.53027	5.30305	1.07995	2.99998	1.32009	2.26114	2.10555	2.02048	1.89262	1.84928
	2.86763	2.35831	2.5784	2.22314	1.13521	0.798041	1.41534	0.798292	2.64981	1.86761	2.20698	1.82701
	3.21399	3.03786	3.11102	2.85374	2.00565	1.53053	3.13623	1.5884	2.63726	2.07991	2.14858	1.64018
	5.9	2.23422	4.48681	2.71891	3.16584	0.37399	3.96552	0.40502	2.31966	1.40155	2.01488	1.9313
	2.65826	14.6684	3.06963	2.80114	3.7637	1.21777	4.52139	1.2279	2.11187	3.0299	2.1413	1.82915
	1.8725	2.07037	2.29612	2.64286	2.06135	1.50028	2.69436	1.7134	1.89273	1.75543	2.14411	1.83846
	4.96354	4.57527	3.82031	4.34534	3.25882	1.22696	4.41047	1.31805	2.66719	2.87648	2.05481	2.04005
	4.96535	13.5099	4.78427	4.47713	1.27764	3.62818	1.70309	3.10134	2.68251	2.67036	1.99421	2.05167
	2.05215	12.1881	2.23197	5.62824	2.0226	1.62537	2.76356	2.45748	2.01151	2.77023	2.10411	2.44571
	4.63527	2.66032	5.9684	3.19014	2.3766	1.63065	3.17036	2.09912	2.34621	2.38226	2.55503	2.07997
	2.55916	3.4124	1.86726	4.18821	0.549971	1.19735	0.384477	1.71601	1.45415	1.66125	1.21867	1.81539
	3.03439	3.63475	2.96574	4.25658	1.21981	1.29678	0.963998	2.12161	2.09486	1.7299	1.81706	2.00269
	4.26739	2.42974	3.10755	3.51294	2.11366	2.17906	1.78158	3.90867	2.3716	1.64565	1.88325	2.11633
	2.098	2.91719	1.55607	3.76548	1.30648	0.966281	1.05322	1.26242	1.96636	1.30297	1.56261	1.59381
	4.39846	1.32783	3.30281	1.07104	1.60986	0.772791	1.49773	0.717271	2.10025	1.15594	1.95521	1.0939
	2.19151	2.61548	1.787	5.228	2.17051	2.20597	2.27576	3.0365	1.64472	1.50878	1.40851	1.54733
	1.84655	3.91247	1.48951	2.96204	1.96037	2.01626	2.21842	2.07662	1.60611	2.45123	1.42493	2.08751
	4.25054	5.05914	2.22648	2.64018	2.0643	1.66067	1.85705	1.25993	2.30659	2.28591	1.30627	1.85306
	2.63521	3.28077	2.16898	1.7454	2.10919	3.59423	2.10096	2.24836	1.757	2.15044	1.59079	1.37353
	2.47017	5.22078	1.7831	3.0865	3.09988	1.11741	2.75461	0.83596	1.8793	2.34468	1.72403	1.44237
	2.51584	3.77888	1.32042	2.66493	1.83401	2.0699	1.97433	1.46992	2.50981	1.89251	1.6315	1.40854
	3.36564	3.37666	2.96039	2.86672	1.28089	2.27962	1.20064	2.31384	2.08457	1.6946	1.78451	1.59075
	4.51218	6.58118	3.76734	3.75678	2.88385	3.19291	2.78637	12.5615	1.83125	2.54877	1.63481	2.43102
	5.51475	4.33893	4.9426	4.53348	2.53818	1.46155	2.8949	1.95241	1.89875	1.87633	1.83832	2.12343
	1.47915	7.60714	1.1343	5.04819	4.50462	1.75868	3.73487	2.34122	1.98398	2.53933	1.49301	2.21445
	6.52002	2.22464	3.34274	1.59482	1.20761	0.858149	1.23309	0.813967	2.21898	1.47576	1.79841	1.08969
	1.32237	2.27625	1.87198	1.88744	1.4435	2.23702	1.87573	2.55271	1.59574	1.66053	1.99402	1.65748
	5.83327	4.03817	6.95927	2.5981	2.50339	1.94886	2.83749	2.20631	1.92872	2.52824	2.13012	1.53132
	2.32321	4.95784	2.17148	1.93411	2.99067	0.7946	3.37927	0.832053	1.84966	1.90042	1.77706	1.11783
	4.32499	1.98131	3.40868	1.66559	1.83007	2.92264	2.5569	2.42869	2.50101	1.84963	2.18022	1.53133
	2.88033	4.34971	2.43488	4.08592	1.26179	1.36152	1.47469	1.62211	1.96498	1.67997	1.70618	2.02346
	3.09203	1.7691	2.45547	1.31887	2.26228	3.24687	2.26577	2.76786	2.27212	1.9547	1.89569	1.95867
	2.89739	4.0853	2.5465	6.39984	4.43746	2.57124	3.93875	2.92973	2.0651	2.29797	1.69478	1.8797
	2.9397	3.69403	2.88353	4.12712	2.12663	2.07123	2.10619	2.15305	1.90017	1.78612	1.66156	1.9607
	3.98593	0.816369	2.441	0.851294	1.36077	2.16755	1.40963	2.32397	2.23052	1.79989	2.0206	1.38119
	4.07325	4.84905	2.34539	3.34284	2.80785	1.13629	1.7942	0.996957	2.49391	2.10034	1.54983	1.84224
	1.57551	3.06366	1.51215	2.50656	1.8808	2.99247	1.93235	3.11844	1.98559	1.75565	1.7951	1.55407
	2.55633	4.7508	2.8853	5.52636	2.24316	3.26822	2.40565	4.56114	1.66925	2.30004	1.66959	1.81088
	3.28781	3.70802	2.91564	3.63177	2.39985	1.63439	2.36956	1.54465	2.36569	2.11316	1.74731	1.89473
	3.48801	2.97851	3.34629	2.56957	3.67263	0.929921	3.89816	0.807358	2.04978	2.18939	1.91746	1.44586
	2.31513	5.19911	2.29228	5.13588	2.7762	2.27643	2.43905	1.97503	1.81102	2.26036	1.55608	2.02646
	2.8064	2.68351	2.34203	2.69239	4.29284	1.64483	4.25872	1.42753	2.21918	1.70604	1.82597	1.62191
	3.98024	3.69716	3.20498	4.00224	1.39022	0.685329	1.06278	0.746739	2.32112	2.28541	2.12246	2.18867
	3.90317		3.30679		1.38902		1.38816		2.14963		1.73812
	5.38313		3.83559		3.20445		2.73258		2.39601		1.66529

## Sheet: Fig 3B
	Age
	N IgA			S IgA			N IgM			S IgM			N IgG			S IgG
	0-18	18-60	>60	0-18	18-60	>60	0-18	18-60	>60	0-18	18-60	>60	0-18	18-60	>60	0-18	18-60	>60
	3.28781	12.1881	4.63527	2.91564	5.62824	5.9684	2.39985	1.62537	2.3766	2.36956	2.45748	3.17036	2.36569	2.77023	2.34621	1.74731	2.44571	2.55503
	2.07037	3.28077	6.52002	2.64286	1.7454	3.34274	1.50028	3.59423	1.20761	1.7134	2.24836	1.23309	1.75543	2.15044	2.21898	1.83846	1.37353	1.79841
	1.32237	4.95784	2.91719	1.87198	1.93411	3.76548	1.4435	0.7946	0.966281	1.87573	0.832053	1.26242	1.59574	1.90042	1.30297	1.99402	1.11783	1.59381
	0.816369	3.69716	2.43589	0.851294	4.00224	4.29473	2.16755	0.685329	0.511989	2.32397	0.746739	0.540841	1.79989	2.28541	2.18536	1.38119	2.18867	1.34603
		1.84655	2.51584		1.48951	1.32042		1.96037	1.83401		2.21842	1.97433		1.60611	2.50981		1.42493	1.6315
		4.25054	2.88033		2.22648	2.43488		2.0643	1.26179		1.85705	1.47469		2.30659	1.96498		1.30627	1.70618
		3.4124	2.89739		4.18821	2.5465		1.19736	4.43746		1.71601	3.93875		1.66125	2.0651		1.81539	1.69478
		4.34971	14.6684		4.08592	2.80114		1.36152	1.21777		1.62211	1.2279		1.67997	3.0299		2.02346	1.82915
		4.07325	2.86763		2.34539	2.5784		2.80785	1.13521		1.7942	1.41534		2.49391	2.64981		1.54983	2.20698
		3.21399	13.5099		3.11102	4.47713		2.00565	3.62818		3.13623	3.10134		2.63726	2.67036		2.14858	2.05167
		2.55916	5.51475		1.86726	4.9426		0.549971	2.53818		0.384477	2.8949		1.45415	1.89875		1.21867	1.83832
		1.32783	2.35831		1.07104	2.22314		0.772791	0.798041		0.717271	0.798292		1.15594	1.86761		1.0939	1.82701
		5.47034	1.98131		5.30305	1.66559		2.99998	2.92264		2.26114	2.42869		2.02048	1.84963		1.84928	1.53133
		3.06366	3.91247		2.50656	2.96204		2.99247	2.01626		3.11844	2.07662		1.75565	2.45123		1.55407	2.08751
		4.51218	2.23422		3.76734	2.71891		2.88385	0.37399		2.78637	0.40502		1.83125	1.40155		1.63481	1.9313
		4.14531	4.32499		3.64019	3.40868		4.54964	1.83007		5.38173	2.5569		2.18098	2.50101		1.83062	2.18022
		4.39846	5.05914		3.30281	2.64018		1.60986	1.66067		1.49773	1.25993		2.10025	2.28591		1.95521	1.85306
		2.31513	2.23727		2.29228	1.97093		2.7762	1.27335		2.43905	1.17546		1.81102	1.4139		1.55608	1.48029
		4.84905	3.52928		3.34284	3.53027		1.13629	1.07995		0.996957	1.32009		2.10034	2.10555		1.84224	1.89262
		2.8064	3.70802		2.34203	3.63177		4.29284	1.63439		4.25872	1.54465		2.21918	2.11316		1.82597	1.89473
		3.90317	3.98024		3.30679	3.20498		1.38902	1.39022		1.38816	1.06278		2.14963	2.32112		1.73812	2.12246
		4.96535	3.54459		4.78427	1.30222		1.27764	7.26385		1.70309	4.749		2.68251	2.80121		1.99421	1.59563
		2.42974	3.03439		3.51294	2.96574		2.17906	1.21981		3.90867	0.963998		1.64565	2.09486		2.11633	1.81706
		1.47915	5.22078		1.1343	3.0865		4.50462	1.11741		3.73487	0.83596		1.98398	2.34468		1.49301	1.44237
		4.0853	2.91189		6.39984	4.06		2.57123	0.781191		2.92973	0.88679		2.29797	1.63062		1.8797	2.03767
		5.83327	3.03786		6.95927	2.85374		2.50339	1.53053		2.83749	1.5884		1.92872	2.07991		2.13012	1.64018
		2.32321	4.96354		2.17148	3.82031		2.99067	3.25882		3.37927	4.41047		1.84966	2.66719		1.77706	2.05481
		2.27625	4.33893		1.88744	4.53348		2.23702	1.46155		2.55271	1.95241		1.66053	1.87633		1.65748	2.12343
		4.7508	7.60714		5.52636	5.04819		3.26822	1.75868		4.56114	2.34122		2.30004	2.53933		1.81088	2.21445
		4.26739	2.9397		3.10755	2.88353		2.11366	2.12663		1.78158	2.10619		2.3716	1.90017		1.88325	1.66156
		3.09203			2.45547			2.26228			2.26577			2.27212			1.89569
		6.58118			3.75678			3.19291			12.5615			2.54877			2.43102
		2.22464			1.59482			0.858149			0.813967			1.47576			1.08969
		3.36564			2.96039			1.28089			1.20064			2.08457			1.78451
		5.38313			3.83559			3.20445			2.73258			2.39601			1.66529
		2.55633			2.8853			2.24316			2.40565			1.66925			1.66959
		5.9			4.48681			3.16584			3.96552			2.31966			2.01488
		2.65826			3.06963			3.7637			4.52139			2.11187			2.1413
		3.98593			2.441			1.36077			1.40963			2.23052			2.0206
		4.57527			4.34534			1.22696			1.31805			2.87648			2.04005
		2.19151			1.787			2.17051			2.27576			1.64472			1.40851
		3.37666			2.86672			2.27962			2.31384			1.6946			1.59075
		4.03817			2.5981			1.94886			2.20631			2.52824			1.53132
		1.8725			2.29612			2.06135			2.69436			1.89273			2.14411
		2.05215			2.23197			2.0226			2.76356			2.01151			2.10411
		1.57551			1.51215			1.8808			1.93235			1.98559			1.7951
		2.66032			3.19014			1.63065			2.09912			2.38226			2.07997
		2.61548			5.228			2.20597			3.0365			1.50878			1.54733
		3.77888			2.66493			2.0699			1.46992			1.89251			1.40854
		2.63521			2.16898			2.10919			2.10096			1.757			1.59079
		2.97851			2.56957			0.929921			0.807358			2.18939			1.44586
		5.19911			5.13588			2.27643			1.97503			2.26036			2.02646
		3.71904			3.88823			2.30364			2.3437			2.01952			2.07516
		3.48801			3.34629			3.67263			3.89816			2.04978			1.91746
		3.69403			4.12712			2.07122			2.15305			1.78612			1.9607
		3.63475			4.25658			1.29678			2.12161			1.7299			2.00269
		2.68351			2.69239			1.64483			1.42753			1.70604			1.62191
		2.47017			1.7831			3.09988			2.75461			1.8793			1.72403
		1.7691			1.31887			3.24687			2.76786			1.9547			1.95867
		2.098			1.55607			1.30648			1.05322			1.96636			1.56261

## Sheet: Fig 3C
	Days after symotom onset
	N IgA		S IgA		N IgM		S IgM		N IgG		S IgG
	0-14	14-37	0-14	14-37	0-14	14-37	0-14	14-37	0-14	14-37	0-14	14-37
	3.71904	2.91189	3.88823	4.06	2.30364	0.781191	2.3437	0.88679	2.01952	1.63062	2.07516	2.03767
	12.1881	7.60714	5.62824	5.04819	1.62537	1.75868	2.45748	2.34122	2.77023	2.53933	2.44571	2.21445
	4.96354	1.32237	3.82031	1.87198	3.25882	1.4435	4.41047	1.87573	2.66719	1.59574	2.05481	1.99402
	2.42974	4.7508	3.51294	5.52636	2.17906	3.26822	3.90867	4.56114	1.64565	2.30004	2.11633	1.81088
	3.28077	2.88033	1.7454	2.43488	3.59423	1.26179	2.24836	1.47469	2.15044	1.96498	1.37353	1.70618
	4.34971	6.52002	4.08592	3.34274	1.36152	1.20761	1.62211	1.23309	1.67997	2.21898	2.02346	1.79841
	3.03786	2.51584	2.85374	1.32042	1.53053	1.83401	1.5884	1.97433	2.07991	2.50981	1.64018	1.6315
	2.23422	2.098	2.71891	1.55607	0.37399	1.30648	0.40502	1.05322	1.40155	1.96636	1.9313	1.56261
	14.6684	0.816369	2.80114	0.851294	1.21777	2.16755	1.2279	2.32397	3.0299	1.79989	1.82915	1.38119
	2.07037	2.89739	2.64286	2.5465	1.50028	4.43746	1.7134	3.93875	1.75543	2.0651	1.83846	1.69478
	4.63527	2.91719	5.9684	3.76548	2.3766	0.966281	3.17036	1.26242	2.34621	1.30297	2.55503	1.59381
	4.26739	2.22464	3.10755	1.59482	2.11366	0.858149	1.78158	0.813967	2.3716	1.47576	1.88325	1.08969
	4.51218		3.76734		2.88385		2.78637		1.83125		1.63481
	1.47915		1.1343		4.50462		3.73487		1.98398		1.49301
	3.06366		2.50656		2.99247		3.11844		1.75565		1.55407
	3.54459		1.30222		7.26385		4.749		2.80121		1.59563
	4.14531		3.64019		4.54964		5.38173		2.18098		1.83062
	3.52928		3.53027		1.07995		1.32009		2.10555		1.89262
	4.03817		2.5981		1.94886		2.20631		2.52824		1.53132
	4.25054		2.22648		2.0643		1.85705		2.30659		1.30627
	4.0853		6.39984		2.57123		2.92973		2.29797		1.8797
	4.96535		4.78427		1.27764		1.70309		2.68251		1.99421
	3.63475		4.25658		1.29678		2.12161		1.7299		2.00269
	4.39846		3.30281		1.60986		1.49773		2.10025		1.95521
	4.33893		4.53348		1.46155		1.95241		1.87633		2.12343
	2.23727		1.97093		1.27335		1.17546		1.4139		1.48029
	2.35831		2.22314		0.798041		0.798292		1.86761		1.82701
	3.21399		3.11102		2.00565		3.13623		2.63726		2.14858
	4.57527		4.34534		1.22696		1.31805		2.87648		2.04005
	2.55916		1.86726		0.549971		0.384477		1.45415		1.21867
	1.32783		1.07104		0.772791		0.717271		1.15594		1.0939
	2.61548		5.228		2.20597		3.0365		1.50878		1.54733
	5.22078		3.0865		1.11741		0.83596		2.34468		1.44237
	1.84655		1.48951		1.96037		2.21842		1.60611		1.42493
	2.27625		1.88744		2.23702		2.55271		1.66053		1.65748
	3.36564		2.96039		1.28089		1.20064		2.08457		1.78451
	2.65826		3.06963		3.7637		4.52139		2.11187		2.1413
	3.69403		4.12712		2.07122		2.15305		1.78612		1.9607
	6.58118		3.75678		3.19291		12.5615		2.54877		2.43102
	4.95784		1.93411		0.7946		0.832053		1.90042		1.11783
	1.7691		1.31887		3.24687		2.76786		1.9547		1.95867
	2.9397		2.88353		2.12663		2.10619		1.90017		1.66156
	2.63521		2.16898		2.10919		2.10096		1.757		1.59079
	3.09203		2.45547		2.26228		2.26577		2.27212		1.89569
	4.07325		2.34539		2.80785		1.7942		2.49391		1.54983
	3.91247		2.96204		2.01626		2.07662		2.45123		2.08751
	13.5099		4.47713		3.62818		3.10134		2.67036		2.05167
	2.32321		2.17148		2.99067		3.37927		1.84966		1.77706
	3.70802		3.63177		1.63439		1.54465		2.11316		1.89473

## Sheet: Fig 3D
	Mild/Asymptomatic
	N IgA		S IgA		N IgM		S IgM		N IgG		S IgG
	Mild	Asymptomatic	Mild	Asymptomatic	Mild	Asymptomatic	Mild	Asymptomatic	Mild	Asymptomatic	Mild	Asymptomatic
	2.91189	2.43589	4.06	4.29473	0.781191	0.511989	0.88679	0.540841	1.63062	2.18536	2.03767	1.34603
	3.54459	2.86763	1.30222	2.5784	7.26385	1.13521	4.749	1.41534	2.80121	2.64981	1.59563	2.20698
	2.35831	5.9	2.22314	4.48681	0.798041	3.16584	0.798292	3.96552	1.86761	2.31966	1.82701	2.01488
	4.14531	1.8725	3.64019	2.29612	4.54964	2.06135	5.38173	2.69436	2.18098	1.89273	1.83062	2.14411
	3.71904	2.66032	3.88823	3.19014	2.30364	1.63065	2.3437	2.09912	2.01952	2.38226	2.07516	2.07997
	3.03786	2.05215	2.85374	2.23197	1.53053	2.0226	1.5884	2.76356	2.07991	2.01151	1.64018	2.10411
	2.23422	3.03439	2.71891	2.96574	0.37399	1.21981	0.40502	0.963998	1.40155	2.09486	1.9313	1.81706
	3.52928	5.05914	3.53027	2.64018	1.07995	1.66067	1.32009	1.25993	2.10555	2.28591	1.89262	1.85306
	2.07037	3.77888	2.64286	2.66493	1.50028	2.0699	1.7134	1.46992	1.75543	1.89251	1.83846	1.40854
	3.21399	2.19151	3.11102	1.787	2.00565	2.17051	3.13623	2.27576	2.63726	1.64472	2.14858	1.40851
	2.65826	3.37666	3.06963	2.86672	3.7637	2.27962	4.52139	2.31384	2.11187	1.6946	2.1413	1.59075
	4.57527	2.47017	4.34534	1.7831	1.22696	3.09988	1.31805	2.75461	2.87648	1.8793	2.04005	1.72403
	13.5099	1.98131	4.47713	1.66559	3.62818	2.92264	3.10134	2.42869	2.67036	1.84963	2.05167	1.53133
	4.96354	3.36564	3.82031	2.96039	3.25882	1.28089	4.41047	1.20064	2.66719	2.08457	2.05481	1.78451
	4.96535	5.51475	4.78427	4.9426	1.27764	2.53818	1.70309	2.8949	2.68251	1.89875	1.99421	1.83832
	4.63527	5.83327	5.9684	6.95927	2.3766	2.50339	3.17036	2.83749	2.34621	1.92872	2.55503	2.13012
	3.63475	4.84905	4.25658	3.34284	1.29678	1.13629	2.12161	0.996957	1.7299	2.10034	2.00269	1.84224
	2.55916	4.32499	1.86726	3.40868	0.549971	1.83007	0.384477	2.5569	1.45415	2.50101	1.21867	2.18022
	2.91719	3.98593	3.76548	2.441	0.966281	1.36077	1.26242	1.40963	1.30297	2.23052	1.59381	2.0206
	1.32783	1.57551	1.07104	1.51215	0.772791	1.8808	0.717271	1.93235	1.15594	1.98559	1.0939	1.7951
	3.91247	2.55633	2.96204	2.8853	2.01626	2.24316	2.07662	2.40565	2.45123	1.66925	2.08751	1.66959
	4.26739	3.48801	3.10755	3.34629	2.11366	3.67263	1.78158	3.89816	2.3716	2.04978	1.88325	1.91746
	5.22078	2.97851	3.0865	2.56957	1.11741	0.929921	0.83596	0.807358	2.34468	2.18939	1.44237	1.44586
	2.098	2.31513	1.55607	2.29228	1.30648	2.7762	1.05322	2.43905	1.96636	1.81102	1.56261	1.55608
	4.39846	5.19911	3.30281	5.13588	1.60986	2.27643	1.49773	1.97503	2.10025	2.26036	1.95521	2.02646
	1.84655	2.8064	1.48951	2.34203	1.96037	4.29284	2.21842	4.25872	1.60611	2.21918	1.42493	1.82597
	2.22464	2.68351	1.59482	2.69239	0.858149	1.64483	0.813967	1.42753	1.47576	1.70604	1.08969	1.62191
	2.27625	3.98024	1.88744	3.20498	2.23702	1.39022	2.55271	1.06278	1.66053	2.32112	1.65748	2.12246
	4.25054	3.69716	2.22648	4.00224	2.0643	0.685329	1.85705	0.746739	2.30659	2.28541	1.30627	2.18867
	4.95784	3.90317	1.93411	3.30679	0.7946	1.38902	0.832053	1.38816	1.90042	2.14963	1.11783	1.73812
	2.63521	5.38313	2.16898	3.83559	2.10919	3.20445	2.10096	2.73258	1.757	2.39601	1.59079	1.66529
	1.7691		1.31887		3.24687		2.76786		1.9547		1.95867
	6.52002		3.34274		1.20761		1.23309		2.21898		1.79841
	3.69403		4.12712		2.07123		2.15305		1.78612		1.9607
	1.32237		1.87198		1.4435		1.87573		1.59574		1.99402
	0.816369		0.851294		2.16755		2.32397		1.79989		1.38119
	2.32321		2.17148		2.99067		3.37927		1.84966		1.77706
	3.06366		2.50656		2.99247		3.11844		1.75565		1.55407
	2.88033		2.43488		1.26179		1.47469		1.96498		1.70618
	3.09203		2.45547		2.26228		2.26577		2.27212		1.89569
	2.89739		2.5465		4.43746		3.93875		2.0651		1.69478
	2.9397		2.88353		2.12663		2.10619		1.90017		1.66156
	3.70802		3.63177		1.63439		1.54465		2.11316		1.89473
	4.07325		2.34539		2.80785		1.7942		2.49391		1.54983
	3.28781		2.91564		2.39985		2.36956		2.36569		1.74731

## Sheet: Fig 4
	N IgA Mild	Moderate	Severe	S IgA Mild	Moderate	Severe	N IgM Mild	Moderate	Severe	S IgM Mild	Moderate	Severe	N IgG Mild	Moderate	Severe	S IgG Mild	Moderate	Severe
	2.91189	2.23727	7.60714	4.06	1.97093	5.04819	0.781191	1.27335	1.75868	0.88679	1.17546	2.34122	1.63062	1.4139	2.53933	2.03767	1.48029	2.21445
	3.54459	5.47034	4.03817	1.30222	5.30305	2.5981	7.26385	2.99998	1.94886	4.749	2.26114	2.20631	2.80121	2.02048	2.52824	1.59563	1.84928	1.53132
	2.43589	12.1881	4.7508	4.29473	5.62824	5.52636	0.511989	1.62537	3.26822	0.540841	2.45748	4.56114	2.18536	2.77023	2.30004	1.34603	2.44571	1.81088
	2.35831	3.4124	14.6684	2.22314	4.18821	2.80114	0.798041	1.19736	1.21777	0.798292	1.71601	1.2279	1.86761	1.66125	3.0299	1.82701	1.81539	1.82915
	4.14531	2.42974	3.83017	3.64019	3.51294	2.83163	4.54964	2.17906	1.01577	5.38173	3.90867	1.65858	2.18098	1.64565	1.37949	1.83062	2.11633	1.39739
	3.71904	2.61548	4.66683	3.88823	5.228	3.60395	2.30364	2.20597	2.65248	2.3437	3.0365	8.62664	2.01952	1.50878	5.79566	2.07516	1.54733	2.29853
	3.03786	3.28077	2.93322	2.85374	1.7454	2.21955	1.53053	3.59423	2.53113	1.5884	2.24836	1.37322	2.07991	2.15044	1.361	1.64018	1.37353	1.35621
	2.23422	6.58118	3.91207	2.71891	3.75678	4.47947	0.37399	3.19291	2.99113	0.40502	12.5615	2.93564	1.40155	2.54877	2.02636	1.9313	2.43102	1.57464
	3.52928	4.33893	12.3791	3.53027	4.53348	6.90204	1.07995	1.46155	8.70174	1.32009	1.95241	6.17515	2.10555	1.87633	9.35683	1.89262	2.12343	4.93826
	2.07037	2.51584	3.003	2.64286	1.32042	3.61348	1.50028	1.83401	1.69865	1.7134	1.97433	2.07594	1.75543	2.50981	1.4194	1.83846	1.6315	1.68456
	2.86763	4.34971	5.59955	2.5784	4.08592	4.53815	1.13521	1.36152	2.20941	1.41534	1.62211	2.80721	2.64981	1.67997	5.95945	2.20698	2.02346	2.08063
	3.21399	4.0853	7.58019	3.11102	6.39984	6.59894	2.00565	2.57123	4.0636	3.13623	2.92973	4.60883	2.63726	2.29797	8.97944	2.14858	1.8797	2.95831
	5.9	4.51218	4.12424	4.48681	3.76734	7.43518	3.16584	2.88385	2.22634	3.96552	2.78637	2.18652	2.31966	1.83125	2.43206	2.01488	1.63481	3.69485
	2.65826	1.47915	4.79062	3.06963	1.1343	5.23772	3.7637	4.50462	2.91776	4.52139	3.73487	3.52427	2.11187	1.98398	7.55153	2.1413	1.49301	3.20539
	1.8725		1.35474	2.29612		2.22748	2.06135		1.05527	2.69436		1.98676	1.89273		0.919394	2.14411		1.12811
	4.57527		1.56678	4.34534		1.82315	1.22696		1.81434	1.31805		1.23055	2.87648		1.3064	2.04005		0.952804
	13.5099		1.89788	4.47713		2.45264	3.62818		2.91775	3.10134		2.65383	2.67036		1.11756	2.05167		0.985869
	4.96354			3.82031			3.25882			4.41047			2.66719			2.05481
	4.96535			4.78427			1.27764			1.70309			2.68251			1.99421
	2.66032			3.19014			1.63065			2.09912			2.38226			2.07997
	2.05215			2.23197			2.0226			2.76356			2.01151			2.10411
	4.63527			5.9684			2.3766			3.17036			2.34621			2.55503
	3.63475			4.25658			1.29678			2.12161			1.7299			2.00269
	2.55916			1.86726			0.549971			0.384477			1.45415			1.21867
	2.91719			3.76548			0.966281			1.26242			1.30297			1.59381
	1.32783			1.07104			0.772791			0.717271			1.15594			1.0939
	3.91247			2.96204			2.01626			2.07662			2.45123			2.08751
	3.03439			2.96574			1.21981			0.963998			2.09486			1.81706
	4.26739			3.10755			2.11366			1.78158			2.3716			1.88325
	5.05914			2.64018			1.66067			1.25993			2.28591			1.85306
	5.22078			3.0865			1.11741			0.83596			2.34468			1.44237
	2.098			1.55607			1.30648			1.05322			1.96636			1.56261
	4.39846			3.30281			1.60986			1.49773			2.10025			1.95521
	3.77888			2.66493			2.0699			1.46992			1.89251			1.40854
	2.19151			1.787			2.17051			2.27576			1.64472			1.40851
	3.37666			2.86672			2.27962			2.31384			1.6946			1.59075
	1.84655			1.48951			1.96037			2.21842			1.60611			1.42493
	2.22464			1.59482			0.858149			0.813967			1.47576			1.08969
	2.27625			1.88744			2.23702			2.55271			1.66053			1.65748
	4.25054			2.22648			2.0643			1.85705			2.30659			1.30627
	4.95784			1.93411			0.7946			0.832053			1.90042			1.11783
	2.63521			2.16898			2.10919			2.10096			1.757			1.59079
	2.47017			1.7831			3.09988			2.75461			1.8793			1.72403
	1.98131			1.66559			2.92264			2.42869			1.84963			1.53133
	3.36564			2.96039			1.28089			1.20064			2.08457			1.78451
	1.7691			1.31887			3.24687			2.76786			1.9547			1.95867
	5.51475			4.9426			2.53818			2.8949			1.89875			1.83832
	6.52002			3.34274			1.20761			1.23309			2.21898			1.79841
	3.69403			4.12712			2.07122			2.15305			1.78612			1.9607
	1.32237			1.87198			1.4435			1.87573			1.59574			1.99402
	0.816369			0.851294			2.16755			2.32397			1.79989			1.38119
	5.83327			6.95927			2.50339			2.83749			1.92872			2.13012
	2.32321			2.17148			2.99067			3.37927			1.84966			1.77706
	4.84905			3.34284			1.13629			0.996957			2.10034			1.84224
	3.06366			2.50656			2.99247			3.11844			1.75565			1.55407
	4.32499			3.40868			1.83007			2.5569			2.50101			2.18022
	2.88033			2.43488			1.26179			1.47469			1.96498			1.70618
	3.09203			2.45547			2.26228			2.26577			2.27212			1.89569
	2.89739			2.5465			4.43746			3.93875			2.0651			1.69478
	2.9397			2.88353			2.12663			2.10619			1.90017			1.66156
	3.70802			3.63177			1.63439			1.54465			2.11316			1.89473
	3.98593			2.441			1.36077			1.40963			2.23052			2.0206
	4.07325			2.34539			2.80785			1.7942			2.49391			1.54983
	1.57551			1.51215			1.8808			1.93235			1.98559			1.7951
	2.55633			2.8853			2.24316			2.40565			1.66925			1.66959
	3.28781			2.91564			2.39985			2.36956			2.36569			1.74731
	3.48801			3.34629			3.67263			3.89816			2.04978			1.91746
	2.97851			2.56957			0.929921			0.807358			2.18939			1.44586
	2.31513			2.29228			2.7762			2.43905			1.81102			1.55608
	5.19911			5.13588			2.27643			1.97503			2.26036			2.02646
	2.8064			2.34203			4.29284			4.25872			2.21918			1.82597
	2.68351			2.69239			1.64483			1.42753			1.70604			1.62191
	3.98024			3.20498			1.39022			1.06278			2.32112			2.12246
	3.69716			4.00224			0.685329			0.746739			2.28541			2.18867
	3.90317			3.30679			1.38902			1.38816			2.14963			1.73812
	5.38313			3.83559			3.20445			2.73258			2.39601			1.66529
